# Supplementary material for: OP-177-4 低左心機能症例に対する冠動脈バイパス術の検討(心臓-5,一般口演,第110回日本外科学会定期学術集会)
Source: Springer Nature journal article supplement (doi:10.1186/s12967-019-1954-8), 2010-03-05

Additional file 3: Figure S2

A

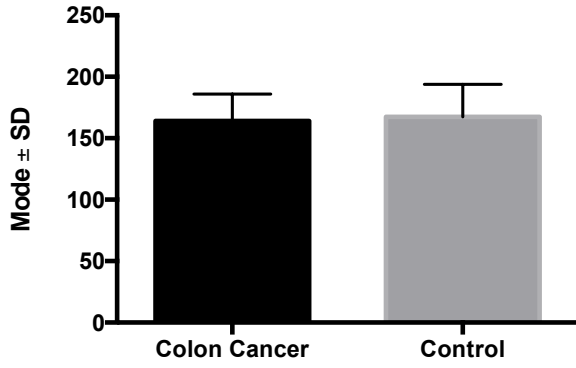

B

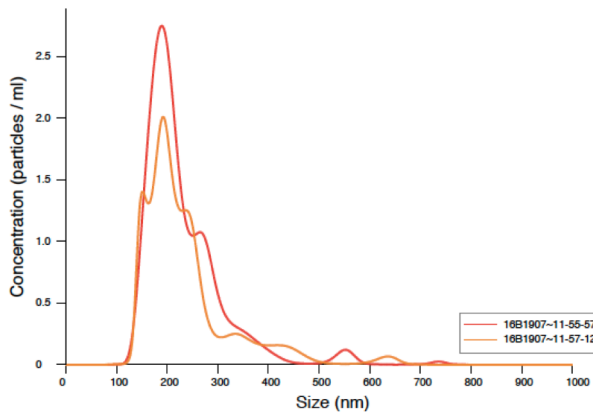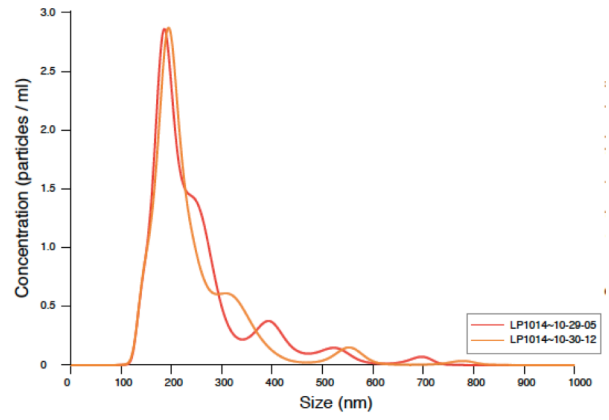

Supplement: MOESM3 [file 16838588]
